# Supplementary material for: Matrilineal phylogeny and habitat suitability of the endangered spotted pond turtle (Geoclemys hamiltonii; Testudines: Geoemydidae): a two-dimensional approach to forecasting future conservation consequences
Source: PeerJ journal article supplement (doi:10.7717/peerj.15975), 2023-09-06
Supplement: Figure_S1.pdf [file Figure_S1.pdf]

**Figure S1.** Maximum Likelihood (ML) phylogenetic tree based on the concatenated nucleotide sequences of 13 PCGs showing the phylogenetic position of *Geoclemys hamiltonii* and other Geoemydidae species.

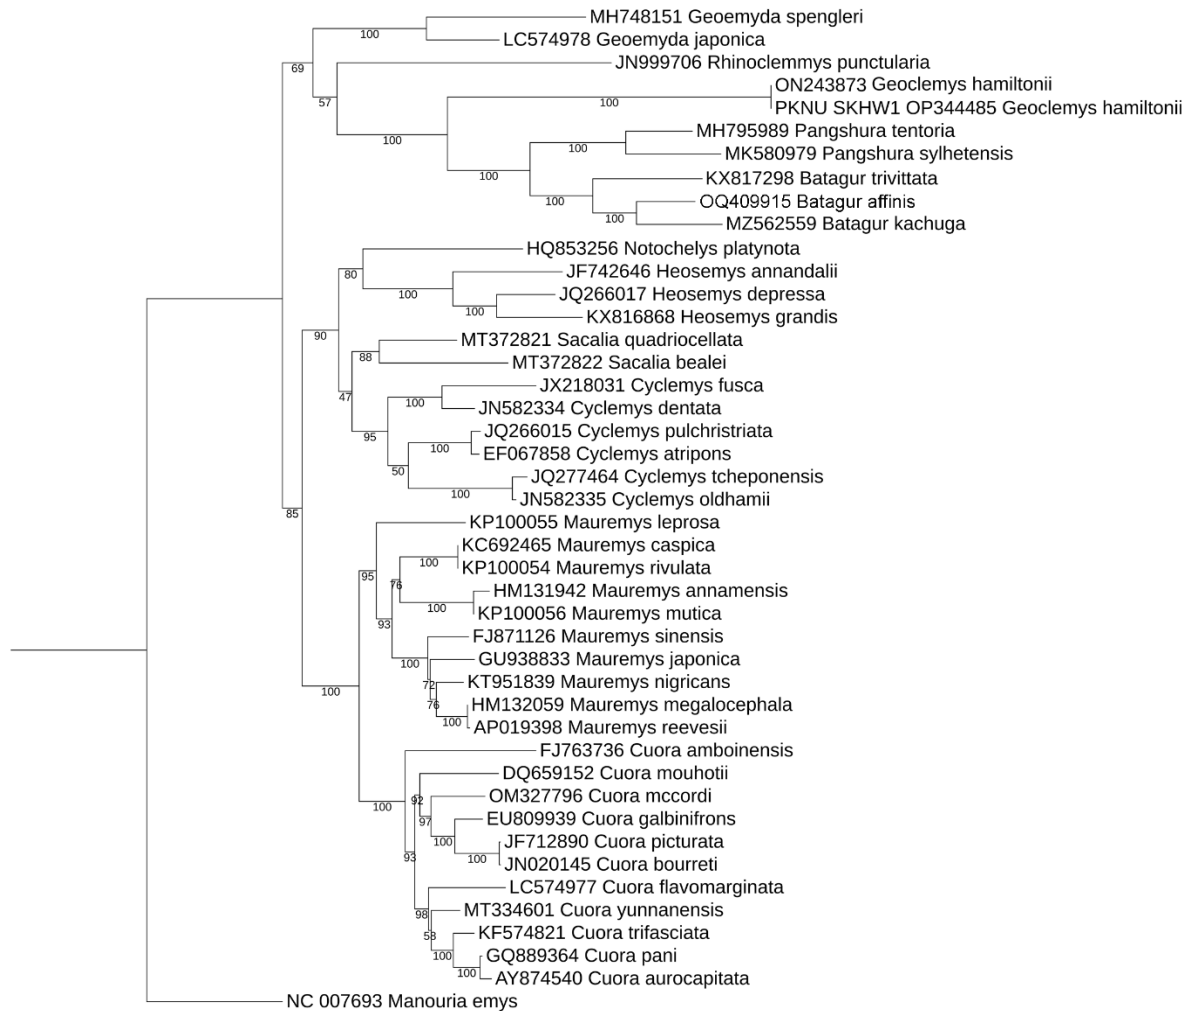

Tree scale: 0.1
