# Supplementary material for: Matrilineal phylogeny and habitat suitability of the endangered spotted pond turtle (Geoclemys hamiltonii; Testudines: Geoemydidae): a two-dimensional approach to forecasting future conservation consequences
Source: PeerJ journal article supplement (doi:10.7717/peerj.15975), 2023-09-06

**Figure S2.** Representing the final set of variables maps used for the distribution modelling of *Geoclemys hamiltonii*.

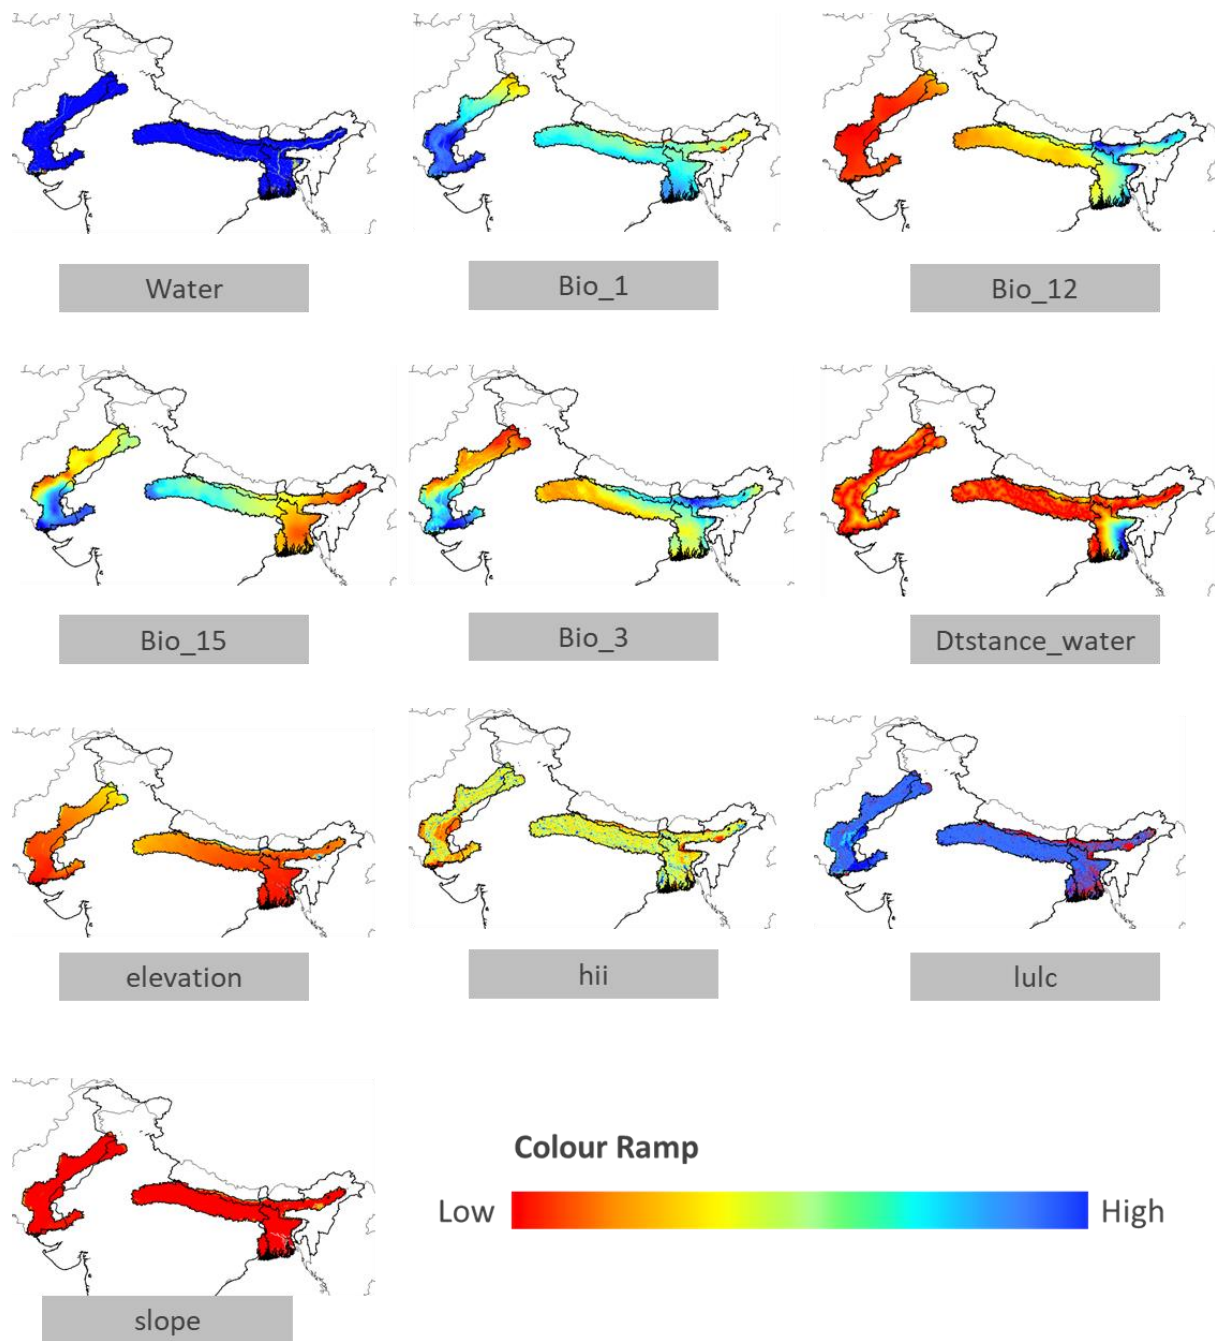

Supplement: Figure_S2.pdf [file Figure_S2.pdf]
