# Supplementary material for: Matrilineal phylogeny and habitat suitability of the endangered spotted pond turtle (Geoclemys hamiltonii; Testudines: Geoemydidae): a two-dimensional approach to forecasting future conservation consequences
Source: PeerJ journal article supplement (doi:10.7717/peerj.15975), 2023-09-06

**Figure S4.** Representing the training omission rate and predicted area as a function of the cumulative threshold, averaged over the replicate runs.

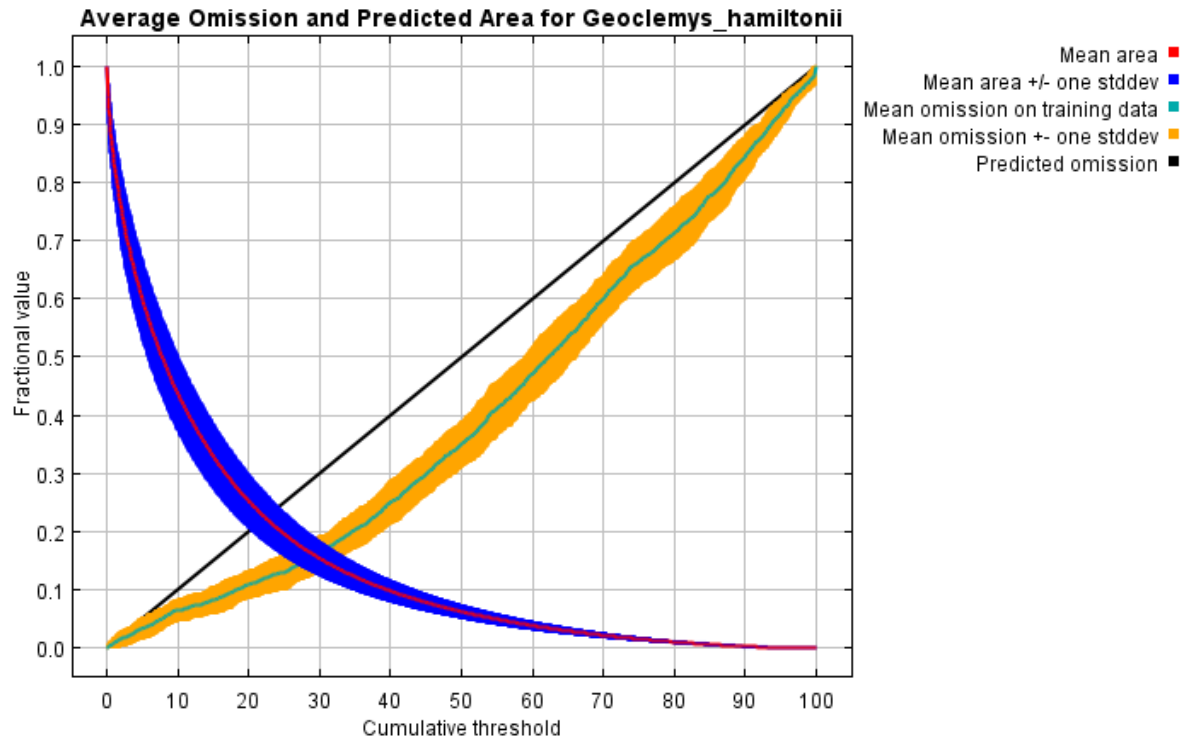

Supplement: Figure_S4.pdf [file Figure_S4.pdf]
