# Supplementary material for: Matrilineal phylogeny and habitat suitability of the endangered spotted pond turtle (Geoclemys hamiltonii; Testudines: Geoemydidae): a two-dimensional approach to forecasting future conservation consequences
Source: PeerJ journal article supplement (doi:10.7717/peerj.15975), 2023-09-06
Supplement: Table_S1.pdf [file Table_S1.pdf]

**Table S1.** List of acquired Testudines species mitogenomes from GenBank database for phylogenetic analysis along with their size and IUCN status.

| <b>Sl. No.</b> | <b>Species</b>               | <b>Subfamily</b> | <b>IUCN status</b>    | <b>Accession number</b> | <b>Size (bp)</b> |
|----------------|------------------------------|------------------|-----------------------|-------------------------|------------------|
| 1              | <i>Geoclemys hamiltonii</i>  | Batagurinae      | Endangered            | OP344485                | 16509            |
| 2              | <i>Geoclemys hamiltonii</i>  | Batagurinae      | Endangered            | ON243873                | 16505            |
| 3              | <i>Batagur affinis</i>       | Batagurinae      | Critically Endangered | OQ409915                | 16625            |
| 4              | <i>Batagur kachuga</i>       | Batagurinae      | Critically Endangered | MZ562559                | 16517            |
| 5              | <i>Batagur trivittata</i>    | Batagurinae      | Critically Endangered | KX817298                | 16463            |
| 6              | <i>Pangshura sylhetensis</i> | Batagurinae      | Critically Endangered | MK580979                | 16568            |
| 7              | <i>Pangshura tentoria</i>    | Batagurinae      | Least Concern         | MH795989                | 16657            |
| 8              | <i>Cuora amboinensis</i>     | Geoemydinae      | Endangered            | FJ763736                | 16708            |
| 9              | <i>Cuora aurocapitata</i>    | Geoemydinae      | Critically Endangered | AY874540                | 16890            |
| 10             | <i>Cuora bourreti</i>        | Geoemydinae      | Critically Endangered | JN020145                | 16649            |
| 11             | <i>Cuora flavomarginata</i>  | Geoemydinae      | Endangered            | LC574977                | 16721            |
| 12             | <i>Cuora galbinifrons</i>    | Geoemydinae      | Critically Endangered | EU809939                | 17244            |
| 13             | <i>Cuora mccordi</i>         | Geoemydinae      | Critically Endangered | OM327796                | 16551            |
| 14             | <i>Cuora mouhotii</i>        | Geoemydinae      | Endangered            | DQ659152                | 16837            |
| 15             | <i>Cuora pani</i>            | Geoemydinae      | Critically Endangered | GQ889364                | 16922            |
| 16             | <i>Cuora picturata</i>       | Geoemydinae      | Critically Endangered | JF712890                | 16623            |
| 17             | <i>Cuora trifasciata</i>     | Geoemydinae      | Critically Endangered | KF574821                | 16675            |
| 18             | <i>Cuora yunnanensis</i>     | Geoemydinae      | Critically Endangered | MT334601                | 16023            |
| 19             | <i>Cyclemys atripons</i>     | Geoemydinae      | Endangered            | EF067858                | 16500            |
| 20             | <i>Cyclemys dentata</i>      | Geoemydinae      | Near Threatened       | JN582334                | 16475            |
| 21             | <i>Cyclemys fusca</i>        | Geoemydinae      | Least Concern         | JX218031                | 16491            |
| 22             | <i>Cyclemys oldhamii</i>     | Geoemydinae      | Endangered            | JN582335                | 16656            |

|    |                                 |                     |                       |           |       |
|----|---------------------------------|---------------------|-----------------------|-----------|-------|
| 23 | <i>Cyclemys pulchristriata</i>  | Geoemydinae         | Endangered            | JQ266015  | 16527 |
| 24 | <i>Cyclemys tcheponensis</i>    | Geoemydinae         | Endangered            | JQ277464  | 16593 |
| 25 | <i>Geoemyda japonica</i>        | Geoemydinae         | Endangered            | LC574978  | 16820 |
| 26 | <i>Geoemyda spengleri</i>       | Geoemydinae         | Endangered            | MH748151  | 17448 |
| 27 | <i>Heosemys annandalii</i>      | Geoemydinae         | Critically Endangered | JF742646  | 16604 |
| 28 | <i>Heosemys depressa</i>        | Geoemydinae         | Critically Endangered | JQ266017  | 16773 |
| 29 | <i>Heosemys grandis</i>         | Geoemydinae         | Critically Endangered | KX816868  | 16581 |
| 30 | <i>Mauremys annamensis</i>      | Geoemydinae         | Critically Endangered | HM131942  | 16844 |
| 31 | <i>Mauremys caspica</i>         | Geoemydinae         | Least Concern         | KC692465  | 16741 |
| 32 | <i>Mauremys japonica</i>        | Geoemydinae         | Near Threatened       | GU938833  | 16443 |
| 33 | <i>Mauremys leprosa</i>         | Geoemydinae         | Vulnerable            | KP100055  | 17067 |
| 34 | <i>Mauremys megalcephala</i>    | Geoemydinae         | Endangered            | HM132059  | 16783 |
| 35 | <i>Mauremys mutica</i>          | Geoemydinae         | Critically Endangered | KP100056  | 16775 |
| 36 | <i>Mauremys nigricans</i>       | Geoemydinae         | Endangered            | KT951839  | 16779 |
| 37 | <i>Mauremys reevesii</i>        | Geoemydinae         | Endangered            | AP019398  | 16784 |
| 38 | <i>Mauremys rivulata</i>        | Geoemydinae         | Least Concern         | KP100054  | 16766 |
| 39 | <i>Mauremys sinensis</i>        | Geoemydinae         | Critically Endangered | FJ871126  | 16461 |
| 40 | <i>Notochelys platynota</i>     | Geoemydinae         | Vulnerable            | HQ853256  | 16981 |
| 41 | <i>Sacalia bealei</i>           | Geoemydinae         | Endangered            | MT372822  | 16564 |
| 42 | <i>Sacalia quadriocellata</i>   | Geoemydinae         | Critically Endangered | MT372821  | 16433 |
| 43 | <i>Rhinoclemmys punctularia</i> | Rhinoclemmydinae    | Least Concern         | JN999706  | 14154 |
| 44 | <i>Manouria emys</i>            | Family Testudinidae | Critically Endangered | NC_007693 | 16455 |
