# Supplementary material for: Matrilineal phylogeny and habitat suitability of the endangered spotted pond turtle (Geoclemys hamiltonii; Testudines: Geoemydidae): a two-dimensional approach to forecasting future conservation consequences
Source: PeerJ journal article supplement (doi:10.7717/peerj.15975), 2023-09-06
Supplement: Table_S3.pdf [file Table_S3.pdf]

**Table S3:** Primary environmental and topographical variables used for ensemble modelling.

| Sl. No.              | Code                  | Variables description                                                                                                                                                                                                                                                                       |
|----------------------|-----------------------|---------------------------------------------------------------------------------------------------------------------------------------------------------------------------------------------------------------------------------------------------------------------------------------------|
| <b>Bioclimatic</b>   |                       |                                                                                                                                                                                                                                                                                             |
| 1.                   | bio_1                 | Annual Mean Temperature                                                                                                                                                                                                                                                                     |
| 2.                   | bio_2                 | Mean Diurnal Range (Mean of monthly (max temp - min temp))                                                                                                                                                                                                                                  |
| 3.                   | bio_3                 | Isothermality (BIO2/BIO7) (* 100)                                                                                                                                                                                                                                                           |
| 4.                   | bio_4                 | Temperature Seasonality (standard deviation *100)                                                                                                                                                                                                                                           |
| 5.                   | bio_5                 | Max Temperature of Warmest Month                                                                                                                                                                                                                                                            |
| 6.                   | bio_6                 | Min Temperature of Coldest Month                                                                                                                                                                                                                                                            |
| 7.                   | bio_7                 | Temperature Annual Range (BIO5-BIO6)                                                                                                                                                                                                                                                        |
| 8.                   | bio_8                 | Mean Temperature of Wettest Quarter                                                                                                                                                                                                                                                         |
| 9.                   | bio_9                 | Mean Temperature of Driest Quarter                                                                                                                                                                                                                                                          |
| 10.                  | bio_10                | Mean Temperature of Warmest Quarter                                                                                                                                                                                                                                                         |
| 11.                  | bio_11                | Mean Temperature of Coldest Quarter                                                                                                                                                                                                                                                         |
| 12.                  | bio_12                | Annual Precipitation                                                                                                                                                                                                                                                                        |
| 13.                  | bio_13                | Precipitation of Wettest Month                                                                                                                                                                                                                                                              |
| 14.                  | bio_14                | Precipitation of Driest Month                                                                                                                                                                                                                                                               |
| 15.                  | bio_15                | Precipitation Seasonality (Coefficient of Variation)                                                                                                                                                                                                                                        |
| 16.                  | bio_16                | Precipitation of Wettest Quarter                                                                                                                                                                                                                                                            |
| 17.                  | bio_17                | Precipitation of Driest Quarter                                                                                                                                                                                                                                                             |
| 18.                  | bio_18                | Precipitation of Warmest Quarter                                                                                                                                                                                                                                                            |
| 19.                  | bio_19                | Precipitation of Coldest Quarter                                                                                                                                                                                                                                                            |
| <b>Topographic</b>   |                       |                                                                                                                                                                                                                                                                                             |
| 20.                  | elevation_2           | Elevation                                                                                                                                                                                                                                                                                   |
| 21.                  | slope                 | Slope                                                                                                                                                                                                                                                                                       |
| <b>Anthropogenic</b> |                       |                                                                                                                                                                                                                                                                                             |
| 22.                  | hii                   | Human Influence Index                                                                                                                                                                                                                                                                       |
| <b>Habitat</b>       |                       |                                                                                                                                                                                                                                                                                             |
| 23.                  | distance_water        | Euclidian distance from major water body                                                                                                                                                                                                                                                    |
| 24.                  | water                 | Occurrence Intensity                                                                                                                                                                                                                                                                        |
| 25.                  | LULC<br>(Categorical) | <ul style="list-style-type: none"> <li>• Herbaceous Vegetation</li> <li>• Permanent Water Bodies</li> <li>• Herbaceous Wetland</li> <li>• Cropland</li> <li>• Bare/Sparse vegetation</li> <li>• Shrubland</li> <li>• Moss and Lichens</li> <li>• Forest</li> <li>• Buildup areas</li> </ul> |
